# Supplementary material
Source: PubMed Central journal article supplement (PMC7193830)
Supplement: plantbiotechnology-37-1-19.1212a-s001.pdf [file plantbiotechnology-37-1-19.1212a-s001.pdf]

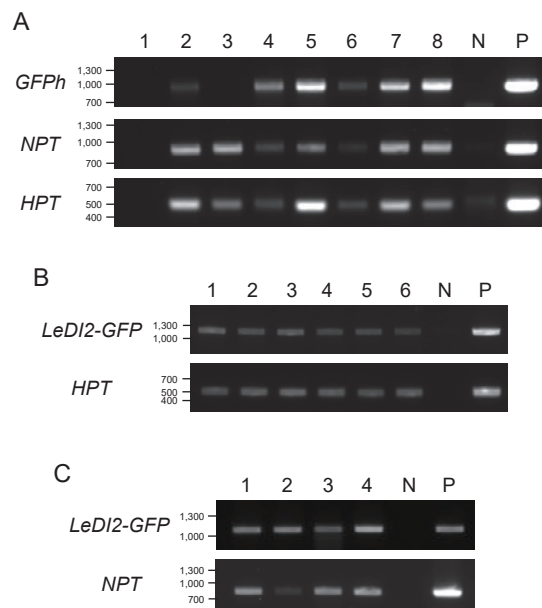

Supplementary Figure S1. Colony PCR of transformed *R. rhizogenes* strain A13. Vector constructs, pBI121\_GFPh (A), pBin19\_LeDI2-GFP (B), and pRI201AN\_LeDI2-GFP (C) were introduced into strain A13 using the modified freeze-thaw transformation method, and emerged colonies were subjected to PCR amplification of the transgenes and antibiotics resistant genes in these vectors. Non-transformed A13 (N) and each plasmid (P) were used as negative control and positive control, respectively. NPT, neomycin phosphotransferase; HPT, hygromycin phosphotransferase.
