# Supplementary material
Source: PubMed Central journal article supplement (PMC7193830)
Supplement: plantbiotechnology-37-1-19.1212a-s002.pdf [file plantbiotechnology-37-1-19.1212a-s002.pdf]

**Supplementary Table S1. Primers used in this study**

| purpose for use                                                | gene/vector                             | sequence                                                                                       |
|----------------------------------------------------------------|-----------------------------------------|------------------------------------------------------------------------------------------------|
| Vector construction of pENTR_mGFP                              | <i>mGFP</i>                             | CACCATGGTGAGCAAGGGCGAGGA<br>TTACTTGTACAGCTCGTCCATGCC                                           |
| Vector construction of pENTR_LePGT1                            | <i>LePGT1</i>                           | GCAGGCTCCGGCGCCGCCACCATGGTTTCCAGCAAACAAACACAG<br>AGCTGGGTCCGGCGGCCAGGAAACAATCTTCCAAGTAAGATTCCG |
| Vector construction of pENTR_LePGT1                            | <i>pENTR/D-TOPO</i>                     | CGCGCCGACCCAGCTTTCTTGTACAAAGT<br>GGCCGCGAGCCTGCTTTTTTGTACAAAGT                                 |
| Vector construction of pGWB505_LeDI2                           | <i>LeDI2</i>                            | CACCATGGCTTCAAGAACTCTATTGCG<br>TGGGCAGCTCCATCCAGAAGG                                           |
| Vector construction of pBin19_LeDI2-GFP                        | <i>LeDI2-GFP</i>                        | ATCTCTAGACCTTACCATGGCTTCAAGAAACTC                                                              |
| Vector construction of pRI201AN_LeDI2-GFP                      | <i>LeDI2-GFP</i>                        | ATCGTCGACCTTACCATGGCTTCAAGA                                                                    |
| Vector construction of pBin19_LeDI2-GFP and pRI201AN_LeDI2-GFP | <i>LeDI2-GFP</i>                        | TTCGAGCTCGGGCCGCTTTACTTTGTAC                                                                   |
| Site direct mutagenesis in <i>Xba</i> I in <i>LeDI2-GFP</i>    | <i>LeDI2-GFP</i>                        | CATGGATCCTCTGGATCGAACCACTTTGTACAA<br>GTGGTTCGATCCAGAGGATCCATGGTGAGCAAG                         |
| Colony PCR and genotyping of hairy root                        | <i>GFP<sub>h</sub></i>                  | ATGGCCAGACTCACAAAGCATATTG<br>TCAAAGCTCATCGTGGTGGTGG                                            |
| Genotyping of hairy root                                       | <i>Actin</i>                            | GTGTTGTGGCTTTATGAATTCAGTCA<br>ATCTCAGATCCGGAAGAAGAAATACGA                                      |
| Genotyping of hairy root                                       | <i>GFP</i>                              | ATGGTGAGCAAGGGCGAGGAGCTGT<br>CTTGACAGCTCGTCCATGCCGTGAGTGAT                                     |
| Colony PCR and genotyping of hairy root                        | <i>NPTII</i> (kanamycin resistant gene) | ATGATTGAACAAGATGGATTGC<br>TCAGAAAGAACTCGTCAAGAAGG                                              |
| Colony PCR and genotyping of hairy root                        | <i>HPT</i> (hygromycin resistant gene)  | TGCCAGTCATAGCCGAATAGCCTCTCCAC<br>CGGAAGTGCTTGACATTGG<br>AGAAGAAGATGTTGGCGACC                   |

**Supplementary Table S2. Medium composition**

|                      | compound                                             | amount (l <sup>-1</sup> ) | callus induction medium | inoculation buffer | co-cultivation medium | root induction medium |
|----------------------|------------------------------------------------------|---------------------------|-------------------------|--------------------|-----------------------|-----------------------|
| 1/2 MS               | MgSO <sub>4</sub> · 7H <sub>2</sub> O                | 185 mg                    | +                       | +                  | +                     | +                     |
|                      | CaCl <sub>2</sub> · 2H <sub>2</sub> O                | 220 mg                    | +                       | +                  | -                     | +                     |
|                      | KNO <sub>3</sub>                                     | 950 mg                    | +                       | +                  | -                     | +                     |
|                      | NH <sub>4</sub> NO <sub>3</sub>                      | 825 mg                    | +                       | +                  | -                     | +                     |
|                      | KH <sub>2</sub> PO <sub>4</sub>                      | 85 mg                     | +                       | +                  | -                     | +                     |
|                      | FeSO <sub>4</sub> · 7H <sub>2</sub> O                | 13.9 mg                   | +                       | +                  | +                     | +                     |
|                      | Na <sub>2</sub> -EDTA                                | 18.65 mg                  | +                       | +                  | +                     | +                     |
|                      | MnSO <sub>4</sub> · 4H <sub>2</sub> O                | 11.15 mg                  | +                       | +                  | +                     | +                     |
|                      | ZnSO <sub>4</sub> · 7H <sub>2</sub> O                | 4.3 mg                    | +                       | +                  | +                     | +                     |
|                      | CuSO <sub>4</sub> · 5H <sub>2</sub> O                | 0.0125 mg                 | +                       | +                  | +                     | +                     |
|                      | CoCl <sub>2</sub> · 6H <sub>2</sub> O                | 0.0125 mg                 | +                       | +                  | +                     | +                     |
|                      | KI                                                   | 0.415 mg                  | +                       | +                  | +                     | +                     |
|                      | H <sub>3</sub> BO <sub>3</sub>                       | 3.1 mg                    | +                       | +                  | +                     | +                     |
|                      | Na <sub>2</sub> MoO <sub>4</sub> · 2H <sub>2</sub> O | 0.125 mg                  | +                       | +                  | +                     | +                     |
|                      | <i>myo</i> -inositol                                 | 100 mg                    | +                       | +                  | +                     | +                     |
|                      | Nicotinic acid                                       | 0.5 mg                    | +                       | +                  | +                     | +                     |
|                      | Pyridoxine hydrochloride                             | 0.5 mg                    | +                       | +                  | +                     | +                     |
|                      | Thiamine hydrochloride                               | 0.1 mg                    | +                       | +                  | +                     | +                     |
|                      | L-glycine                                            | 2 mg                      | +                       | +                  | +                     | +                     |
|                      | Sucrose                                              | 10 g                      | +                       | +                  | +                     | +                     |
|                      | Kinetin                                              | 100 µmol                  | +                       | -                  | -                     | -                     |
|                      | Indole acetic acid                                   | 10 µmol                   | +                       | -                  | -                     | -                     |
|                      | Acetosyringone                                       | 100 µmol                  | -                       | +                  | +                     | -                     |
| Meropenem trihydrate | 20 mg                                                | -                         | -                       | -                  | +                     |                       |
| Agar                 | 10 g                                                 | +                         | -                       | +                  | +                     |                       |

+, contained; -, not contained
